36 chromatin-related proteins, transcription factors and other components of the transcriptional  
37 machinery <sup>1</sup>. Therefore, different systems evolved in the eukaryotic nuclei to act as ‘writers’,  
38 able to deposit covalent chemical groups on specific histone residues, ‘readers’, which can  
39 directly bind and help to interpret histone marks, and ‘erasers’, actively removing histone post-  
40 translational modifications. The orchestration of histone modifying enzymes allows for a  
41 highly dynamic chromatin regulation crucial to control nuclear structure and transcription <sup>2</sup>.  
42 Two important histone modifications that are well conserved between plants and animals are  
43 the trimethylation on the lysine 27 of the histone H3 (H3K27me3) <sup>3</sup> and the monoubiquitination  
44 of the histone H2A that in plants mostly occurs on the lysine 121 (H2Aub) <sup>4</sup>.

45 H3K27me3 and H2Aub are deposited, both in plants and animals, by two major types of  
46 Polycomb repressive complexes (PRCs), respectively PRC2 and PRC1. PRC2 is a four-core  
47 subunit complex in which the catalytic component is a SET (Su(var), Enhancer of zeste,  
48 Trithorax) domain histone methyltransferase (HMT) <sup>5,6</sup>. Analyses in different plant genomes  
49 showed that PRC2 decorates approximately 20-25% of euchromatic genes with H3K27me3,  
50 which switches them off in response to internal and external cues <sup>7,8</sup>. In plants, PRC1 is formed  
51 by E3 ligases and other auxiliary proteins <sup>5,9</sup>. Both PRCs maintain an intricate relationship in  
52 which members of the two complexes can directly interact, have common associated proteins  
53 and share target genes. This is also reflected in their activities as H3K27me3 can precede  
54 H2Aub (i.e. hierarchical model) or oppositely follows this modification on the chromatin.  
55 Furthermore, both marks can independently regulate different set of genes <sup>7,9</sup>.

56 In animals, H2AK119ub can be erased by the Polycomb Repressive-Deubiquitinase (PR-DUB)  
57 complex <sup>10</sup>. This complex contains a DUB protein of the ubiquitin carboxy-terminal (UCH)  
58 family, which does not have an obvious orthologous in plants <sup>11</sup>. Indeed, the PR-DUB has not  
59 been described in plants so far, but two proteins of the UBIQUITIN PROTEASE (UBP) family,  
60 UBP12 and UBP13 redundantly mediate H2A deubiquitination <sup>12,13</sup> and interact with LIKE  
61 HETEROCHROMATIN PROTEIN 1 (LHP1) <sup>12</sup>, a H3K27me3 reader and interactor of both  
62 PRC2 and PRC1 components <sup>7,9</sup>. UBP12/13 regulate a similar set of genes with PRC2 and  
63 PRC1 <sup>13</sup>.

64 To develop their activities, PRCs require a complex network of protein-protein interactions <sup>7</sup>.  
65 We and others recently demonstrated that PWWP-DOMAIN INTERACTOR OF  
66 POLYCOMBS1 (PWO1) is a key regulator of PRC2 activity, able to interact with the HMTs  
67 of the PRC2 complex <sup>14</sup> and to form part of the PEAT complex (PWO/PWWP-EPCRs

68 (ENHANCER OF POLYCOMB RELATED)-ARIDs (AT-RICH INTERACTION DOMAIN-  
69 CONTAINING)-TRBs (TELOMERIC REPEAT BINDING)) involved in heterochromatin  
70 dynamics<sup>15</sup>. Still, we are far from understanding the molecular impact of the PWO1-PRC2  
71 interaction.

72 Here we show that UBP5 is a novel interactor of PRC2 and PWO1 that is able to affect both  
73 H3K27me3 and H2Aub marks as well as the expression of a set of PRC2 target genes in  
74 *Arabidopsis thaliana* (Arabidopsis). Telobox and GAGA motifs, previously related to PRC2  
75 recruitment<sup>16,17</sup>, are among the most enriched signatures of UBP5 binding to the chromatin.  
76 The vast majority of UBP5 direct target genes showed either hyper-marking or *de-novo*  
77 marking by H2Aub in *ubp5* plants, altogether indicating that UBP5 acts as a sequence-specific  
78 eraser of this epigenetic mark. Together, our data uncovers UBP5 as a new PRC2-interactor  
79 module directly controlling H2Aub deubiquitination and affecting H3K27 trimethylation to  
80 regulate gene expression.

## 81 **Results**

### 82 **UBP5 is a novel interactor of PRC2 and PWO1**

83 We had identified the UBIQUITIN PROTEASE 5 (UBP5) protein as the most abundant  
84 interactor co-immunoprecipitated with Arabidopsis PWWP-DOMAIN INTERACTOR OF  
85 POLYCOMBS1 (PWO1)<sup>18</sup>. Furthermore, data mining of proteins in co-immunoprecipitation  
86 (co-IP) experiments with PEAT components also identified UBP5<sup>15</sup>. Therefore, we aimed to  
87 understand the link between UBP5, PWO1 and PRC2. Firstly, to elucidate the sub-cellular  
88 localisation of UBP5, transient inducible expression was performed using the  $\beta$ -estradiol-  
89 inducible 35S promoter (*i35S*) fused to an *UBP5* (*i35S::UBP5-GFP*) construct  
90 in *Nicotiana benthamiana* (*N. benthamiana*) and found that UBP5 is exclusively nuclear,  
91 localises all over the nucleoplasm in a diffused way but not in the nucleolus (Fig. 1A). Further,  
92 we analysed the possibility of an interaction between UBP5 and PWO1 *in planta*. Using a  
93 similar approach, we co-expressed PWO1-GFP and UBP5-mCherry fusion proteins  
94 in *N. benthamiana*. It is noteworthy that, as previously shown for CLF, co-expression of both  
95 proteins modified UBP5 localisation recruiting it to PWO1-containing nuclear speckles and, to  
96 a lower extent, co-localisation of both proteins was also observed all over the nucleoplasm  
97 (Fig. 1B)<sup>14,18</sup>. PWO1-UBP5 association in both speckles and nucleoplasm was demonstrated  
98 by Foster resonance energy transfer with acceptor photobleaching (FRET-APB). FRET-APB  
99 efficiencies for co-expressed samples were significantly higher than the negative controls

100 (PWO1-GFP and UBP5-GFP expressed without donor mCherry construct) (Fig. 1C). The  
101 FRET-APB donor signal intensity was significantly higher in the speckles than in the  
102 nucleoplasm, which can be due to PWO1 and UBP5 stronger association and/or because of a  
103 higher probability of contacts between both proteins within the speckles (Fig. 1C). Yeast two-  
104 hybrid (Y2H) assays not only confirmed the interaction of UBP5 with PWO1 but also revealed  
105 its interaction with the PRC2 HMT subunit SWINGER (SWN)  $\Delta$ SET (SWN clone lacking the  
106 SET domain;<sup>19</sup>) (Fig. 1D). *In planta* interaction between SWN $\Delta$ SET and UBP5 was further  
107 confirmed using co-IP assays in *N. benthamiana* (Fig. 1E). Therefore, UBP5 is an interactor of  
108 PWO1-PRC2 suggesting the possibility that it may play a role in PRC-mediated regulation of  
109 gene expression. Furthermore, Y2H assays showed interaction of UBP5 with EMBRYONIC  
110 FLOWER 2 (EMF2), another PRC2 component<sup>20</sup>, which further confirms the PRC2-UBP5  
111 connection (Supplementary Fig. 1).

## 112 **UBP5 is an essential plant developmental and stress responses regulator**

113 To understand UBP5 molecular functions in Arabidopsis, we generated an *ubp5*  
114 deletion mutant line via the CRISPR/Cas9 system with two guide RNAs, which partially  
115 deleted both DUSP and UBP conserved domains (Supplementary Fig. 2A-C). The phenotypic  
116 analyses of *ubp5* mutant plants showed pleiotropic defects such as stunted growth due to the  
117 lack of apical dominance (Fig. 2A (i-iii)), shorter roots and hypocotyl length (Fig. 2A ii and  
118 2B), floral architecture defects (Fig. 2A (v-vi)), fertilisation defects (Supplementary Fig. 2D)  
119 and poor pollen germination (Supplementary Fig. 2E), suggesting that UBP5 acts as a  
120 developmental regulator at different stages of the plant life cycle. Stable transformation of  
121 *UBP5pro::UBP5-eGFP* was able to fully rescue the developmental pleiotropic phenotypes of  
122 *ubp5* (Fig. 2A (iv)). qRT-PCR analyses further showed no significant difference in the relative  
123 expression of *UBP5* between Col-0 and the complementation line *UBP5pro::UBP5-*  
124 *eGFP;ubp5* (Supplementary Fig. 3A-B). Transcriptional analyses of *ubp5* seedlings showed  
125 that 345 genes were up-regulated, and 478 genes were down-regulated (Fig. 2C;  
126 Supplementary list 1). Mis-regulation of major developmental genes including *KNOTTED-*  
127 *LIKE FROM ARABIDOPSIS THALIANA* (*KNAT1*), *PISTILLATA*, *MERISTEM*  
128 *DISORGANIZATION 1* (*MDO1*), *SAMBA* and *GAMETOPHYTIC DEFECTIVE 1* (*GAF1*)  
129 correlated with some of the observed *ubp5* mutant phenotypes (Supplementary list 2). In  
130 addition, considering the bushy-like phenotype, we analysed the expression of several genes  
131 encoding transcription factors involved in controlling the shoot apical meristem that are also

132 PRC2 repressed (i.e., marked by H3K27me3). Our RT-qPCR analyses demonstrated their  
133 upregulation in *ubp5* (Supplementary Figure 4A-E). Gene Ontology (GO) analyses identified  
134 that genes associated with biotic and abiotic stress responses terms were significantly enriched  
135 among all *ubp5* mis-regulated genes (Fig. 2D). Consistently with previous studies showing that  
136 PRC2-associated components do not only regulate expression of genes related to plant  
137 development<sup>13, 21, 22</sup>, our results indicate a dual role of UBP5 in regulating both Arabidopsis  
138 developmental and stress responses.

### 139 **UBP5 deubiquitinates H2A**

140 UBP5 was shown *in vivo* to be involved in de-ubiquitination of hexa-ubiquitin  
141 substrates<sup>23</sup> and other UBP family members have been linked to the histone  
142 monoubiquitination removal<sup>24, 25, 26</sup>. In addition, the existence of the interaction between  
143 UBP5, PRC2 HMTs and PWO1 made us speculate that UBP5 may contribute to PRC-mediated  
144 histone monoubiquitination dynamics. Therefore, we analysed different histone marks  
145 abundance in *ubp5* and Col-0 seedlings by western blot (WB) assays and, in good agreement  
146 with UBP5 acting in H2Aub removal, we found that H2Aub bulk levels were more than 3-fold  
147 higher in *ubp5* (Fig. 3A). To gain insight into the affected loci, we profiled the genome-wide  
148 distribution of H2Aub in *ubp5* and Col-0 seedlings using ChIP-seq. Our H2Aub data in Col-0  
149 seedlings showed a good overlap with previous published data (Supplementary Fig. 5) and,  
150 when compared to Col-0 seedlings, we observed a large increase in the number of genes  
151 uniquely marked by H2Aub in *ubp5* (21,017 in *ubp5* instead of 15,615 genes in Col-0;  
152 Supplementary list 3-4), which includes genes that differentially gained H2Aub in *ubp5*  
153 (n=7,438; Fig. 3B), hence UBP5 is necessary to erase or decrease H2Aub in several thousands  
154 of genes.

155 To test whether UBP5 could act in H2Aub removal *in cis*, we further analysed the genome-  
156 wide association of UBP5-GFP in our *UBP5pro::UBP5-eGFP;ubp5* line. Notably, UBP5  
157 binding extends to a large part of the plant genome since the UBP5-GFP ChIP-seq profiling  
158 identified 8,983 genes as direct targets of UBP5 (Supplementary Fig. 6A-C; Supplementary  
159 list 5), which corresponds to ~27% of the total number of Arabidopsis genes according to TAIR  
160 10 annotation<sup>27</sup>. More precisely, UBP5 directly targets 69% of the genes gaining *de novo* a  
161 H2Aub peak in *ubp5* (i.e., *de-novo* marked genes, Fig. 3C and 3D), and 61% of the genes for  
162 which H2Aub peaks are increased in *ubp5* (i.e., hyper-marked genes) (Fig. 3C and 3E).  
163 Importantly, there is a sharp co-localisation between UBP5 chromatin association and domains

164 where the H2Aub mark was gained in *ubp5* (Fig. 3D-E; Supplementary Fig. 7A;  
165 Supplementary list 6). This frequent co-occurrence strongly argues in favour for a direct role  
166 of UBP5 in H2Aub deubiquitination at its binding sites (Fig. 3F). Further supporting this  
167 observation, increase in H2Aub levels in *ubp5* is more evident at UBP5 target genes than for  
168 other, non-targets, H2Aub marked genes (Fig. 3G-H and Supplementary Fig. 7B). To confirm  
169 these observations, selected UBP5 targets that are H2Aub hyper-marked in *ubp5* were further  
170 validated by ChIP-qPCR (Supplementary Fig. 7C). Overall, these results indicate that UBP5  
171 acts in *cis* on H2Aub mark by both maintaining the H2Aub level in a set of genes marked with  
172 this modification and erasing the H2Aub mark from a larger set of genes.

### 173 **UBP5 plays a role in transcriptional de-repression**

174 Functional categorisation of UBP5 direct targets revealed that genes related to  
175 chromosome organisation, histone binding and chromatin binding were significantly over-  
176 represented (Supplementary Fig. 8A-C). In addition to UBP5 interaction with PWO1 and SWN  
177 chromatin factors, we identified its direct binding to several PRC2 subunit genes such as *CLF*,  
178 *EMF2*, *VERNALIZATION 2 (VRN2)*, *FERTILIZATION-INDEPENDENT ENDOSPERM (FIE)*  
179 and *MULTICOPY SUPPRESSOR OF IRA 1 (MSI1)* and PRC1 subunit encoding gene *B*  
180 *LYMPHOMA Mo-MLV INSERTION REGION ONE HOMOLOG (BMI1B)* (Supplementary list  
181 6). H2Aub mark was also gained in these genes (Supplementary list 6), although for most of  
182 the genes we did not observe transcriptional changes in *ubp5*. On the other hand, GO analyses  
183 of UBP5 target genes that gained the H2Aub mark in *ubp5* revealed a significant over-  
184 representation of genes involved in response to DNA damage and repair (Supplementary Fig.  
185 8D).

186 At the genome-wide level, UBP5 binding to chromatin typically occurs at the proximity of the  
187 transcription start site (TSS) and the start of the coding region (Supplementary Fig. 6A).  
188 Analyses of UBP5 binding peaks showed that majority of these sites correspond to protein  
189 coding genes, particularly exons and 5'UTRs that respectively correspond to ~51% and ~23%  
190 of the binding sites (Supplementary Fig. 9). Hence, we evaluated the impact of UBP5 in the  
191 transcriptional output of its target genes by integrating our ChIP-seq and RNA-seq data. We  
192 found a clear link between UBP5 gene binding and repression since 43% (207/478) of the genes  
193 downregulated in *ubp5* correspond to UBP5 targets gaining H2Aub in *ubp5*, whereas UBP5 is  
194 almost never found associated to upregulated genes (4/345 genes) (Fig. 4A-B). More generally,  
195 *ubp5* associated defects in transcription and H2Aub levels globally correlate (Fig. 4C-D),

196 suggesting a role of UBP5 in relieving H2Aub-mediated repression, thereby promoting gene  
197 expression. Therefore, UBP5 seems to be predominantly involved in H2Aub erasure, which, at  
198 least for a set of its targets genes, results in transcriptional de-repression.

### 199 **UBP5-mediated H2A deubiquitination prevents deposition of H3K27me3**

200 To explore whether UBP5 is targeted to chromatin in a sequence-specific manner, we analysed  
201 sequence motifs at UBP5 binding sites using MEME-ChIP<sup>28</sup> and identified a significant over-  
202 representation of GAGA, Telobox and Telobox-related motifs (Fig. 5A). Notably, GAGA  
203 elements recognised by transcription activators/repressors and Telobox motifs typically  
204 recognised by TRBs, are involved in recruiting PRC2 and TRBs together with PWOs form part  
205 of the PEAT complex<sup>17, 29, 30</sup>. These results thus suggest the existence of sequence-specific  
206 mechanisms commonly recruiting UBP5, PWO proteins and PRC activity.

207 Therefore, to further unravel the relationship between UBP5 function and PRC2 activity, we  
208 analysed H3K27me3 bulk level by WB analysis and identified a 70% increase in its abundance  
209 in *ubp5* (Fig. 5B). We conducted ChIP-seq to further determine the genome-wide effects of  
210 UBP5 on H3K27me3. Our data showed a high overlap of H3K27me3 marked genes in Col-0  
211 seedlings with previously published data<sup>(31)</sup>; Supplementary Fig. 10A; Supplementary list 3).  
212 In addition, our genome-wide data showed that, at UBP5 target genes, H3K27me3 level was  
213 higher on average in *ubp5* (Fig. 5C). Notably, high H3K27me3 level was particularly  
214 pronounced at gene domains corresponding to UBP5 binding sites (Fig. 5C-D). Differential  
215 analysis of H3K27me3 marks revealed 2,587 H3K27me3 hyper-marked and 2,363 H3K27me3  
216 depleted genes in *ubp5* (Supplementary list 7). Further analyses of ChIP-seq data based on  
217 differential analysis showed that in 602 genes the following conditions concurred: i)  
218 H3K27me3 and ii) H2Aub gained in *ubp5*, and iii) directly bound by UBP5 (Fig. 5E and 5F;  
219 Supplementary Fig. 10B), indicating that UBP5 not only erases H2Aub but also affects  
220 H3K27me3 at multiple sites. In addition, our data revealed that only 3% of H3K27me3  
221 depleted genes were UBP5 targets (Supplementary Fig. 10C), suggesting that UBP5 may not  
222 play a direct role in H3K27me3 maintenance at these genes and therefore these changes might  
223 likely result from indirect effects in the regulation of H3K27me3 writers' or erasers' activity.  
224 In agreement with a repressive role of H3K27me3 marking, average H3K27me3 levels in the  
225 gene body of *ubp5* downregulated genes was significantly higher than Col-0 levels, and there  
226 were no significant changes in the upregulated genes (Fig. 5G) and, similarly, we found a

227 correlation between H3K27me3 and transcript levels in *ubp5* (Fig. 5H). Hence, UBP5 may de-  
228 repress such genes by preventing H3K27me3 enrichment.

229 To understand how both H2Aub and H3K27me3 dynamics affect the transcriptional levels of  
230 genes we focussed on the set of genes which gained H2Aub in *ubp5*. In this set of genes, we  
231 analysed the transcriptional levels of H3K27me3/H2Aub marked genes in both Col-0 and *ubp5*  
232 and found that in both background, genes that are exclusively marked by H2Aub are more  
233 highly expressed than genes with the two marks or only H3K27me3, as previously shown  
234 (Zhou *et al.*, 2017). On the other hand, while in Col-0 plants there is a significant difference in  
235 transcriptional levels of H2Aub/H3K27me3 versus H3K27me3 marked genes, this difference  
236 is lost in *ubp5* with both categories showing similar repressive levels (Supplementary Fig.  
237 10D). Hence, UBP5 may contribute to pose H2Aub/H3K27me3 marked genes in a more  
238 responsive chromatin structure. Overall, we thus conclude that in the subset of 602 genes,  
239 UBP5-mediated H2Aub deubiquitination prevents the deposition of H3K27me3 mark leading  
240 to a de-repressed chromatin environment (Fig. 6).

## 241 Discussion

242 PRC2 interactors play a key role in regulating its molecular activities and recruitment to  
243 chromatin <sup>7</sup>. For instance, we previously showed that PWO1 may mediate in providing PRC2  
244 with the right chromatin environment to methylate H3 <sup>14</sup>. In addition, PWO1 was proposed to  
245 form part of the PEAT complex mediating silencing <sup>15</sup>. Therefore, unravelling the protein  
246 interactors associated with epigenetic pathways can provide important clues to understand their  
247 possible crosstalk and activities. Here, we have demonstrated that UBP5 is a novel interactor  
248 of PWO1 and PRC2. UBP5 was also identified co-immunoprecipitating with all main  
249 components of PEAT <sup>15</sup>. Most deubiquitinases may require to be in multi-subunit complexes  
250 to be enzymatically active, as it has been shown for H2A deubiquitinases Myb-like SWIRM  
251 (2A-DUB) and USP22 in human cells <sup>32, 33, 34</sup> or H2B deubiquitinase UBP22/USP22 in plants  
252 and other eukaryotes <sup>35</sup>. On the other hand, UBP5 binding sites are enriched in *Telobox* and  
253 other telomeric related motifs that have been previously involved in PRC2 recruitment by  
254 TRBs at genes <sup>17</sup> and telomeric regions <sup>36</sup>. TRBs are also one of the components of the PEAT  
255 complex <sup>15</sup>. Therefore, a plausible hypothesis is that sequence-specific UBP5 chromatin  
256 association is, at least in part, driven by its interaction with PWO1 in the frame of the PEAT  
257 complex. Future analyses to identify UBP5 protein network will also help to confirm whether  
258 UBP5 associates to TRBs and/or other PEAT subunits. Furthermore, whether UBP5 forms a



259 stable complex or a more dynamic protein network with its interactors and whether its activities  
260 depend on, or are independent of, these interactions will be important questions to address.

261 UBP5 belongs to the UBP family, which is part of the conserved DUB superfamily. Several  
262 DUBs are involved in the regulation of chromatin and some of them especially in H2A  
263 deubiquitination <sup>11</sup>. For instance, *Drosophila* protein Calypso as well as its corresponding  
264 ortholog in humans, the tumour suppressor BRCA-1-associated protein 1 (BAP1), form part of  
265 a PR-DUB complex able to remove the H2AK119ub1 mark. Intriguingly, PR-DUB has been  
266 described as a type of PRC despite its opposite activity to PRC1. Therefore, it seems that a  
267 dynamic ubiquitination/deubiquitination counterbalance is key for maintaining PRCs'  
268 activities and proper H2A ubiquitination levels over the genome <sup>37,38,39</sup>. Phylogenetic analyses  
269 confirmed that there are three proteases in Arabidopsis, UCH1-3, that belongs to the same  
270 family as Calypso/BAP1; however, it is unknown if any of them have conserved a similar  
271 function in plants <sup>11</sup>. Indeed, UCH1-3 have recently been related with the control of the  
272 circadian clock oscillation under high temperatures <sup>40</sup> and previously with the response to  
273 auxins during development <sup>41</sup>, but no data link these proteins to chromatin regulation so far.  
274 The only proteins that have been related to H2A deubiquitination in Arabidopsis are the closely  
275 related UBP12 and 13 proteins, which were identified interacting with LHP1 <sup>26</sup>, a protein that  
276 may act as an accessory protein in both PRC2 and PRC1 <sup>7</sup>. UBP12 was shown to be involved  
277 in the repression of a subset of PRC2 targets mediating H3K27me3 deposition and to be  
278 actively involved in H2A deubiquitination <sup>26</sup>. UBP12/13-mediated H2Aub removal prevents  
279 loss of H3K27me3 and therefore these proteins may be involved in stable PRC2-mediated  
280 repression <sup>13</sup>. In contrast, our data indicate a role of UBP5 in preventing H3K27me3 gain at  
281 specific loci (Fig. 6). Moreover, the genes that are regulated by UBP12/13 (i.e. H2Aub gained  
282 genes in *ubp12/13*) and UBP5 direct targets show little overlap (Supplementary Fig. 11A),  
283 suggesting that they act through independent mechanisms or at different genome domains.  
284 However, as UBP12/13 direct target genes have not been described so far, this conclusion  
285 needs to be cautiously considered as indirect results in *ubp12/13* epigenomic data cannot be  
286 discarded <sup>13</sup>.

287 UBP12/13 are the closest Arabidopsis orthologs to UBIQUITIN SPECIFIC PROTEASE 7  
288 (USP7) in animals <sup>11</sup>. In *Drosophila*, USP7 has been involved in the regulation of PcG targets  
289 and in gene silencing through heterochromatin formation, which seems to play a key role in  
290 genome stability <sup>42</sup>. In addition, studies using cancer cell lines demonstrated that USP7 directly  
291 interacts and stabilises EZH2, the HMT of PRC2 <sup>43</sup>, and PRC1.1, one of the human PRC1

292 complexes <sup>44</sup>, indicating another scenario for the activities of the USP7 like proteins <sup>45</sup>. On the  
293 other hand, UBP5 closest human orthologs are USP4, USP11 and USP15 <sup>11</sup>. Among them,  
294 *USP11* has been described as an oncogene that regulates cell cycle and cancer progression  
295 through DNA repair. USP11 acts in both H2AK119 and H2BK120 deubiquitination as part of  
296 the nucleosome remodelling and deacetylase (NuRD) complex and specifically deubiquitinates  
297  $\gamma$ H2AX, which is key in homologous recombination <sup>46</sup>. Our ChIP-seq profiling in seedlings  
298 identified that UBP5 is required for H2Aub deubiquitination at a majority of PRC1-regulated  
299 Arabidopsis genes, and, considering *ubp5* phenotypes, UBP5 may have additional effects on  
300 H2Aub epigenome at other developmental stages. H2Aub ChIP-seq profile also points to a dual  
301 role of UBP5 deubiquitination activity. In ~40% of genes showing a H2Aub gain in *ubp5*,  
302 UBP5 acts to maintain a certain level of H2Aub in the plant; while, in ~60% of this set of genes,  
303 UBP5 fully erases this histone mark. Overall, these results indicate that UBP5 acts in *cis* to  
304 maintain the right H2Aub level at target genes with two possible scenarios for each locus: this  
305 modification is either 1) erased by UBP5 in most cells and therefore not detected in Col-0  
306 plants but only in *ubp5* (i.e. *de novo* marked genes) or 2) stably present in Col-0 seedlings but  
307 removed by UBP5 only in certain genome copies or in certain cells (i.e. H2Aub hyper-marked  
308 genes). Further studies will be required to fully understand how UBP5 discerns between these  
309 different scenarios.

310 Therefore, our results point to a conservation between Arabidopsis UBP5 and human USP11  
311 activities as H2A deubiquitinases. Whether UBP5 may have additional roles in DNA repair as  
312 USP11 will require further investigation, but the fact that many H2Aub-enriched UBP5 target  
313 genes are related with DNA damage and binding supports this possibility. As our H2Aub ChIP-  
314 seq data was obtained for the bulk of this histone modification, we cannot rule out that these  
315 epigenomic data in fact reflects the ubiquitination status of specific H2A variants. Thus, it will  
316 be very interesting to test if UBP5 differentially affects the post-translational modifications of  
317 H2A variants, such it has been shown for H2AX deubiquitination by USP11 <sup>46</sup>. Another  
318 exciting possibility to explore will be the deubiquitination of the H2A.Z histone variant, which  
319 ubiquitination is mediated by PRC1 to induce PRC2-independent transcriptional repression <sup>47</sup>.  
320 The possibility that UBP5 mediates H2A.Z deubiquitination is supported by the remarkable  
321 overlap between H2A.Z marked genes and UBP5 direct targets that gained H2Aub in *ubp5*  
322 (Supplementary Fig. 11B), opening future venues to further understanding UBP5 activities.

323 Mirroring the meta-gene pattern of H2Aub in Arabidopsis (<sup>31</sup>; Fig. 3D), UBP5 predominantly  
324 binds to chromatin in the vicinity of TSSs and at the start of protein coding regions.

325 Furthermore, our transcriptional analyses show that UBP5 target genes tend to be  
326 downregulated in the *ubp5* mutant. These results point to UBP5 acting as a transcriptional  
327 activator, as shown for H2A deubiquitination in animals <sup>48</sup>. As UBP5 acts in histone  
328 deubiquitination, we favour the possibility of its active role in promoting transcriptional de-  
329 repression through the erasure of H2Aub as it has been proposed for other erasers (e.g. histone  
330 demethylases <sup>49</sup>). However, gain of H2Aub in *ubp5* is not always synonymous of changes in  
331 transcription in a comparable way as accessible chromatin is not always leading to activation  
332 <sup>50</sup>.

333 Our expression analyses in *ubp5* also indicate that stress responsive genes are among the most  
334 affected. Notably, it has been proposed that H2Aub is involved in creating a repressive but  
335 reactive chromatin environment <sup>50</sup> and, thus, UBP5 may be a key factor in positively regulating  
336 the chromatin of genes that need to respond to specific environmental signals. Indeed, the  
337 combined analyses of the transcriptomic and epigenomic data in WT versus *ubp5* showed that,  
338 while having only H3K27me3 is more repressive than being marked by H2Aub and  
339 H3K27me3, both in previous <sup>31</sup> and in our data, this difference is lost in *ubp5*. This may suggest  
340 that UBP5 is essential to keep H2Aub under a certain threshold that helps H2Aub/H3K27me3  
341 marked genes to be more reactive. On the other hand, PWO1 was proposed to mediate PRC2-  
342 related repression of stress responsive genes <sup>18, 51</sup>. A possible scenario is that UBP5-PWO1  
343 antagonistic activities, respectively as activator and repressor, create a bistable and more  
344 responsive chromatin.

345 In line with the UBP5-PRC2 protein interaction identified here, UBP5 influences H3K27me3  
346 levels at a majority of H3K27me3-marked genes (4,950 out of 7,600 genes), ~20% of them  
347 corresponding to direct target sites at the seedling stage (1,013 genes). For these genes,  
348 deposition of H2Aub plausibly precedes H3K27 trimethylation on the same nucleosome, as  
349 suggested for several PRC1/PRC2 target genes <sup>52</sup>, and hence UBP5-mediated deubiquitination  
350 will prevent H3K27me3 deposition by PRC2 (Fig. 6), probably making chromatin more  
351 accessible in these loci. Our proposed functional model also fits well with evolutionary results  
352 linking the deposition of H3K27me3 to the ubiquitination of H2A in *Marchantia polymorpha*  
353 <sup>53</sup>. Despite all our results leading to an UBP5-PRC2 interaction, we should not forget that  
354 many UBP5 target genes that are enriched in H2Aub do not gain H3K27me3, indicating that  
355 UBP5 plays PRC2-independent functions. This opens further fascinating questions about  
356 UBP5 alternative activities in controlling chromatin accessibility that we look forward to  
357 answering in future studies.

## 358 **Materials and Methods**

### 359 **Plant Materials and Cultivation conditions**

360 All *Arabidopsis thaliana* (*Arabidopsis*) lines used in this study were in the Columbia-0 (Col-  
361 0) ecotype background. For the generation of *ubp5* CRISPR-Cas9 mutant, double guide system  
362 of Cas9-directed mutagenesis was performed as described by <sup>54</sup> to delete a fragment size of  
363 3,361 bp from *UBP5* gDNA sequence (Supplementary Fig. 2A). sgRNAs were designed using  
364 CRISPR-P tool <sup>55</sup>. The P3-Cas9-mCherry vector for generating the *ubp5* line was kindly  
365 provided by Charles Spillane's lab <sup>54</sup>. Deletion of the genomic fragment from *UBP5* was  
366 confirmed using Sanger sequencing (LGC genomics, Germany). Transgenic plants were  
367 developed by *Agrobacterium*-mediated gene transformation with floral dip method <sup>56</sup>. For  
368 genotyping, DNA extraction was done based on <sup>57</sup>. Oligonucleotide primers used for CRISPR-  
369 Cas9 mutagenesis and genotyping are indicated in Supplementary Table 1. For the  
370 *UBP5pro::UBP5-GFP;ubp5* line, a 1,708-kb-upstream fragment and gene-body regions of  
371 *UBP5* without stop codon were amplified from genomic DNA of Col-0 with GW-compatible  
372 primers (Supplementary Table 1). *gUBP5* was fused with a C-terminal GFP sequence in the  
373 (pGKGWG) vector <sup>58</sup>.

374 Sterilised seeds were sown on Murashige & Skoog medium (MS Base) supplemented with 1%  
375 Sucrose, 0.1% MES, 0.8% agar with pH adjusted to 5.6, stratified at 4 °C for three days and  
376 placed to Percival tissue culture cabinet under a 16:8 h light: dark (21°C/18°C) regime until  
377 they were transferred to soil. *Arabidopsis* plants were grown on pots containing compost,  
378 vermiculite and perlite (5:1:1 proportion) with the same photoperiod under fluorescent lamps  
379 at 200  $\mu\text{mol m}^{-2} \text{s}^{-1}$ . For hypocotyl and root length measurements, Col-0 and *ubp5* seeds were  
380 sown on MS medium, and the plates were placed vertically in the growth chamber in LD  
381 conditions. Photographs were taken at the end of 10 days, hypocotyl and root length were  
382 measured using the Fiji image processing software.

### 383 **Yeast two hybrid assay**

384 For yeast two hybrid assays, untransformed *Saccharomyces cerevisiae* AH109 cultures were  
385 grown at 28 °C, on solid or liquid Yeast Peptone Dextrose (YPD) media supplemented with  
386 adenine (80 mg/L). The *S. cerevisiae* AH109 competent cells were obtained as previously  
387 described <sup>59</sup>. For Yeast two hybrid (Y2H) experiments, yeast were co-transformed using a heat  
388 shock method at 42°C for 30 min <sup>60</sup>. For plating, 3  $\mu\text{l}$  of culture were plated at the same

389 concentration on drop-out media (minimal medium) in the absence of leucine and tryptophan  
390 (SD-L-W) or more restrictive media without histidine (SD-L-W-H) in serial dilutions. Yeast  
391 growth was analysed after 3 to 4 days growing at 28°C. Both bait and prey empty vectors were  
392 used as negative controls.

### 393 **Co-immunoprecipitation assay**

394 Modified versions of pMDC7 carrying the GFP or mCherry tags <sup>61</sup> were used to insert the  
395 coding sequence of *UBP5* and *SWNΔSET* via Gateway cloning (Invitrogen). Vectors were  
396 transformed in *Agrobacterium tumefaciens* (Agrobacterium) GV3101 pMP90. For transient  
397 expression assays, the abaxial sides of leaves of 4/5-week-old *Nicotiana benthamiana* plants  
398 were infiltrated with transformed Agrobacterium cell culture suspension in log phase growth.  
399 Expression was induced by spraying 20 μM β-estradiol in 0.1% Tween onto infiltrated leaves  
400 48 to 72 h after Agrobacterium infiltration. Fluorescence was monitored in leaf epidermis cells  
401 after a short induction period (4–6 h when fluorescence was visible) using an Olympus BX51  
402 epifluorescence microscope. After 6 h from the second induction of β-estradiol, the samples  
403 were frozen in liquid N<sub>2</sub>. The samples were ground in a liquid N<sub>2</sub> pre-cooled mortar followed  
404 by 20 min at 4°C in a shaker in 10 ml of protein extraction buffer (10% glycerol, 150 mM  
405 NaCl, 2.5 mM EDTA, 20 mM Tris-HCl pH 8, 1% Triton and Complete® EDTA-free protease  
406 inhibitor cocktail (1 tablet/50 ml; Roche)). After resuspension, samples were filtered through  
407 two Miracloth (Calbiochem®) layers and centrifuge at 4°C 15 min 4,000 rpm. After  
408 centrifugation, the supernatants were transferred to a new 15 mL tube, and the extracts were  
409 taken, mixed with 3X Laemmli buffer (0.3 M Tris-HCl (pH 6.8); 10 % (w/v) SDS; 30 % (v/v)  
410 glycerol; 0.6 M DTT; 0.01% (w/v) bromophenol blue) and heated at 95°C for 5 min. Co-IPs  
411 were carried out by incubating the samples with 30 μL of protein A agarose bead slurry for 4h  
412 at 4°C in a rotating wheel and with anti-mCherry (Takara 632496) of 1:1000 dilution. After 4  
413 h incubation, a centrifugation at 4°C at 500 g for 2 min was carried out to precipitate the beads.  
414 The beads were washed 3 times with protein extraction buffer, resuspended in 3× Laemmli  
415 buffer and denatured at 95°C for 10 min. Proteins were loaded in 10% SDS-PAGE gels and  
416 transferred to a PVDF membrane. Membranes were developed with anti-GFP (Roche  
417 11814460001).

418

419

## 420 **Subnuclear Localisation and FRET assay**

421 For subnuclear localization in *N. benthamiana*, estradiol-inducible pMDC7-derivatives  
422 plasmid vectors containing our coding sequences were transformed  
423 into Agrobacterium (GV3101 PMP90 strain with p19 silencing suppressor plasmid). FRET  
424 assay was performed as described in <sup>18</sup>. Images were captured by confocal microscopy on a  
425 LSM780 (Zeiss) or SP8 (Leica).

## 426 **Histone extraction and Western Blot**

427 Nuclei were extracted from 1.5 g of 12 days after germination (DAG) seedlings using the nuclei  
428 extraction buffer (0.4 M Sucrose, 10mM Tris-HCl pH 8.0, 5mM  $\beta$ -Mercaptoethanol, 10mM  
429 MgCl<sub>2</sub>, 0.1mM PMSF). Extracted nuclei were treated overnight with 0.4 N H<sub>2</sub>SO<sub>4</sub> to obtain a  
430 histone-enriched extract. The extracted proteins were precipitated with 33% trichloroacetic  
431 acid and then washed 3 times with acetone, air-dried, and re-suspended in 100  $\mu$ L 3X Laemmli  
432 buffer. The samples were boiled for 10 min, separated on 15% sodium dodecyl sulfate-  
433 polyacrylamide electrophoresis gels and transferred to a polyvinylidene difluoride membrane  
434 (Immobilon-P Transfer membrane, Millipore) by wet blotting in transfer buffer (25 mM Tris-  
435 HCl, 192 mM glycine, and 10% methanol). Primary and secondary antibodies used were anti-  
436 H2Aub antibody (Cell Signalling Technology D27C4), anti-H2A antibody (Active Motif  
437 91325), anti-H3K27me3 antibody (Millipore 07-449), anti-H3 (Abcam ab1791), anti-mouse  
438 IgG (H+L) HRP conjugated (Chemicon International AP308P) and Anti-Rabbit IgG (whole  
439 molecule)-Peroxidase (Sigma Aldrich A9169). Chemiluminescence detection was done with  
440 SuperSignal West Pico or Femto (Thermo Fischer Scientific) following the manufacturer's  
441 instructions.

## 442 **ChIP-qPCR, ChIP-seq and Data analyses**

443 Chromatin immunoprecipitations (ChIP) were carried out using 12-DAG seedlings as  
444 described previously <sup>25</sup>. Chromatin was extracted from formaldehyde fixed tissue and  
445 fragmented using a Bioruptor® Pico (Diagenode) in fragments of 200–500 bp. Antibodies used  
446 for ChIP-qPCR in this study were H3K27me3 (Millipore 07-449) and H2Aub (Cell Signalling  
447 Technology D27C4). 30  $\mu$ L/sample of Protein A Dynabeads (10002D) were used for  
448 preclearing before IP. The IP was performed with 60  $\mu$ L/sample of Protein A Dynabeads and 5

449  $\mu$ l of antibodies in the ChIP dilution buffer at 4°C overnight. Following IP, chromatin was  
450 washed with four different wash buffers- Low Salt, High salt, LiCl and TE wash buffer  
451 sequentially. Then, the chromatin was eluted and crosslinking was reversed overnight at 65°C.  
452 After IP, DNA was eluted and purified using ultrapure phenol:chloroform:isoamyl alcohol  
453 (25:24:1) pH 8.05 followed by ethanol precipitation. Input DNA was diluted to 1:10, and 1  $\mu$ l  
454 of IP DNA was used for quantitative PCR (qPCR). ChIP-qPCRs were carried out in a  
455 CFX96™ Real-Time PCR Detection System (Bio Rad) using Takyon™ No Rox SYBR  
456 MasterMix dTTP Blue (Eurogentec). Oligonucleotide primers used for ChIP-qPCR are listed  
457 in Supplementary Table 1.

458 For ChIP-seq experiments, chromatin extraction and immunoprecipitation of histones were  
459 done as previously described <sup>25</sup> in three biological replicates for H2Aub and two biological  
460 replicates for H3K27me3 at 12-DAG old Col-0 and *ubp5* seedlings grown under LD  
461 conditions. Two IPs were carried out for each biological replicate using 100  $\mu$ g of chromatin,  
462 quantified using Pierce BiCinchoninic Acid (BCA) assay kit (Thermo Fisher Scientific). After  
463 IP, DNA was eluted and purified. Library preparation and paired end sequencing was  
464 performed using DNA Nanoballs (DNB™) sequencing technology from BGI (Sequencing  
465 method: DNBSEQ-G400\_PE100). Reads were mapped using STAR v2.7.8a <sup>62</sup> onto TAIR10  
466 Arabidopsis with parameters align intron max as 1 and align ends type as EndToEnd. The  
467 organelle genomes were excluded from the mapped reads. Duplicated reads were removed  
468 using Picard tool MarkDuplicates option. Only uniquely mapped reads were retained for further  
469 analysis. Marked peaks for each IP were obtained using MACS3 <sup>63</sup> with parameters broad peak  
470 and q value cut off as 0.05. Browser tracks were obtained using the bamCoverage function by  
471 scaling with the parameter --normalizeUsing RPGC. Tracks were visualised using IGV v2.12.3  
472 <sup>64</sup>. Bedtools Utility Intersect <sup>65</sup> was used to intersect the MACS3 peaks obtained from the  
473 biological replicates. The resulting peaks from the biological replicates were merged and  
474 annotated with TAIR10 gene coordinates. To determine gain or depletion of H2Aub or  
475 H3K27me3 marks, the number of reads mapping into the peak coordinates was calculated using  
476 Bedtools Utility Multicov and the peaks from all samples were grouped by gene-ID to obtain  
477 unique peak coordinates per marked gene using Bedtools Utility Groupby v2.26.0 <sup>65</sup>.  
478 Differential enrichment of respective marks between samples were done using DESeq2  
479 analysis <sup>66</sup>. The comparison between biological replicates of H2Aub and H3K27me3 are shown  
480 in Supplementary Fig. 12 and 13.

## 481 **UBP5-GFP ChIP-seq and data analyses**

482 UBP5-GFP ChIP was performed with *UBP5pro::UBP5-GFP;ubp5* line using a double  
483 crosslinking protocol as described <sup>67</sup>. Two biological replicates with 2 g each from 12-DAG  
484 seedlings were ground in liquid N<sub>2</sub> to fine powder and resuspended in nuclei isolation buffer  
485 (60 mM HEPES pH 8.0, 1 M Sucrose, 5 mM KCl, 5 mM MgCl<sub>2</sub>, 5 mM EDTA, 0.6% Triton  
486 X-100, 0.4 mM PMSF, pepstatin and complete protease inhibitors (Roche). Then, the samples  
487 were cross-linked with 25 mM ethylene glycol bis succinimidyl succinate (EGS) by rotating  
488 for 20 min and with 1% formaldehyde by rotating for 10 min. The crosslinking of samples was  
489 stopped by 2M glycine for 10 min at room temperature. The chromatin was isolated and sheared  
490 into 200–500 bp fragments by sonication. For IP, the sonicated chromatin was incubated with  
491 20 µl of anti-GFP antibody (Thermo Fisher #A11122) overnight at 4°C while gentle rotating.  
492 Followed by IP, eluted and purified DNA of two independent biological replicates along with  
493 input control without antibody was used for library preparation and paired end sequencing was  
494 performed using DNB™ sequencing technology from BGI.

495 For UBP5-GFP ChIP-seq data analysis, Raw data with adapter sequences or low-quality  
496 sequences was filtered using SOAPnuke software (BGI). The reads were mapped to the  
497 Arabidopsis genome (TAIR10) using Bowtie2 2.4.5 <sup>68</sup> with default parameters. Only uniquely  
498 mapped reads were retained for further analysis. Peaks were called using MACS3 <sup>63</sup>. The peaks  
499 were converted to bigwig files using deepTools <sup>69</sup>. bamCoverage was done using RPGC  
500 normalisation. The intersections of common peaks between two biological replicates with  
501 FDR < 0.01 was obtained using Bedtools Utility Intersect v2.30.0 <sup>65</sup>. The oligonucleotide  
502 primers used to confirm few UBP5-target genes using ChIP-qPCR are listed in  
503 the Supplementary Table 1. Comparison between ChIP-seq replicates were shown in  
504 Supplementary Fig. 13

505 For DNA motifs analyses, we considered -500 bp to +250 bp from TSS for the UBP5 target  
506 genes using ‘getfasta’ function. We searched for enriched DNA motifs using the fasta file as  
507 a input for MEME-ChIP <sup>28</sup> with discriminative mode using the negative control sequences  
508 wherein UBP5 targeting regions were removed.

## 509 **RNA isolation, quantitative RT PCR**

510 Total RNA was isolated from 12-DAG seedlings (Col and *ubp5*) using E.Z.N.A. Plant RNA  
511 Kit (OMEGA biotek) following manufacturer instructions. The RNA concentration was



512 determined using the Nanophotometer (IMPLEN). RNA was examined by electrophoresis on  
513 a 1.2% agarose gel. For cDNA synthesis, RNA samples were subjected to DNase treatment  
514 and cDNA synthesis was performed using (Thermo Scientific). Quantitative real time PCR  
515 (qRT-PCR) was performed in a CFX96<sup>TM</sup> Real-Time PCR Detection System (Bio Rad) using  
516 Takyon<sup>TM</sup> No Rox SYBR MasterMix dTTP Blue (Eurogentec). Expression levels were  
517 normalised to the reference genes *At5G25760* and *At4G34270*<sup>70</sup>. Relative enrichment was  
518 calculated using the  $2^{-\Delta\Delta CT}$  method<sup>71</sup>

### 519 **RNA-seq library preparation, sequencing and bioinformatics**

520 For RNA-seq, RNA was extracted from 12-DAG seedlings with four biological replicates for  
521 each background (*Col-0* and *ubp5*). Library preparation and RNA-seq was performed  
522 according to the protocol described recently<sup>72</sup>. 500 ng DNase-treated RNA was used for  
523 reverse transcription with 50 mM different barcoded oligo(dT) primers and SuperScript III.  
524 Each reaction was pooled, pools were Ampure purified (1.5x beads to sample volumes) and  
525 then eluted. Second-strand synthesis was carried out using nick translation protocol (Krzyszton  
526 et al. 2022). Tagmentation reaction<sup>73</sup> was performed out using recovered dsDNA sample  
527 incubated with homemade Tn5 enzyme in a freshly prepared 2x buffer (20 mM Tris-HCl pH  
528 7.5, 20 mM MgCl<sub>2</sub>, 50% DMF). Illumina indexing PCR was performed using the tagmented  
529 DNA. Libraries were sequenced on Illumina NextSeq 500 system using the paired-end mode  
530 to obtain 21 nt R1 (contain barcode and Unique Molecular Identifier (UMI)) and 55 nt R2  
531 (contain mRNA sequences).

532 After quality control using fastqc, reads R1 and R2 were processed separately. In our oligo(dT)  
533 primers two parts of UMI are split by barcode sequence, therefore we transformed read R1  
534 fastq file using awk command. Read R2 was trimmed to remove potential contamination with  
535 poly(A) tail using BRBseqTools v 1.6 Trim<sup>74</sup>. Reads were mapped using STAR v 2.7.8a<sup>62</sup> to  
536 TAIR 10 genome with Araport11 genome annotation. Finally, the count matrix for each library  
537 and each gene was obtained using BRBseqTools (v 1.6) CreateDGEMatrix<sup>74</sup> with parameters  
538 *-p UB -UMI 14 -s yes*, using Araport11 genome annotation and a list of barcodes. The  
539 differential gene expression analysis was done using the DESeq2<sup>75</sup>. Further, the genes were  
540 filtered based on log<sub>2</sub> fold-change of  $\pm 1$  and an adjusted p-value of less than 0.05 and  
541 categorised as upregulated, downregulated, and unaltered genes. GO enrichment analysis was  
542 performed in different gene set using ShinyGO tool<sup>76</sup>.

543 **Funding**

544 SF and MG were supported by 20/FFP-P/8693 grant from Science Foundation Ireland and by  
545 a NUI Galway Research Grant for Returning Academic Careers QA151. JG was supported  
546 through the NUI Galway Hardiman Scholarship programme and Thomas Crawford Research  
547 Grant. JG internship at IBENS was supported by the COST Action CA16212 INDEPTH (EU).  
548 EM was funded by a College of Science and Engineering scholarship (NUI Galway). Work in  
549 FB and CB laboratory was supported by ANR-18-CE13-0004-01 and ANR-20-CE13-0028  
550 grants from the French National Research Agency. SS was supported by Foundation for Polish  
551 Science (TEAM POIR.04.04.00-00-3C97/16) and by Polish National Science Centre  
552 (SONATA BIS UMO-2018/30/E/NZ1/00354). MK was supported by Polish National Science  
553 Centre (OPUS UMO-2021/41/B/NZ3/02605).

554 **Authorship contributions**

555 JG and SF conceptualised the experiment approach and designed the methodology; JG, EM,  
556 LW and JL performed the experiments; JG, MG, AF, MK, FB and CB performed the genomic  
557 data curation, analysis, and visualisation; JG and SF wrote the original manuscript; JG, FB,  
558 CB, SS, DS, and SF contributed to the interpretation of results; all the authors contributed to  
559 manuscript revision and approved the final manuscript.

560 **Acknowledgements**

561 SF acknowledges support from the College of Science and Engineering (University of  
562 Galway). SF is grateful to Jennifer Siobal and Ronan Halton for technical support.

563

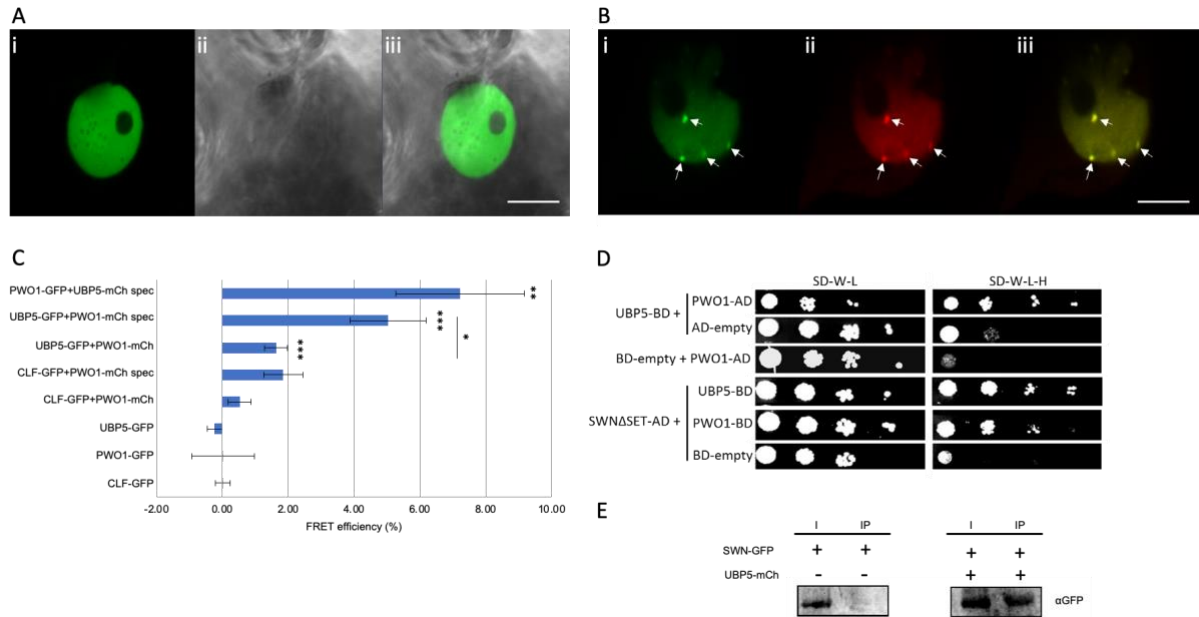

564

565 **Figure 1. UBPS5 is a nuclear protein that interacts with PRC2 and colocalises with PW01.** A and  
566 B, transient and inducible expression in *N. benthamiana* epidermal cells, bar = 10µm. A, *i35S::UBPS5-*  
567 *GFP* (i, confocal; ii, bright field; iii, overlay). B, *i35S::UBPS5-GFP* and *i35S::PW01-mCherry* co-  
568 transformation (i, *i35S::UBPS5-GFP*; ii, *i35S::PW01-mCherry*; iii, overlay). Arrows indicate speckles.  
569 C, FRET-APB measurements for nuclei exemplified in B, with a distinction for speckle (spec) and non-  
570 speckle localisation. CLF-GFP and PW01-mCherry measurement was used as positive control  
571 (Mikulski et al., 2019). An average of efficiency for n = 7-19 is shown. Significance level was measured  
572 in comparison to control or as indicated using Student's t-test and is represented by \*p<0.05, \*\*p<0.01,  
573 \*\*\*p<0.001. D, Y2H analyses confirm UBPS5-PW01 interaction and show an UBPS5-SWN interaction.  
574 Yeast cells containing the different construct combinations on selective medium for plasmids (-LW; -  
575 leucine, tryptophan) or for reporter gene activation (-LWAH; -leucine, tryptophan, adenine, histidine).  
576 Serial solutions were used. BD, GAL4-DNA binding fusion; AD, GAL4-DNA activation domain  
577 fusion. SWNΔSET, SWN construct lacking the SET domain. E, Co-IP analyses confirming SWN-  
578 UBPS5 interaction. IP was performed with anti-mCherry antibody and proteins were detected by western  
579 blot with anti-GFP. I, 5% input; IP, immunoprecipitation.

580

581

582

583

584

585

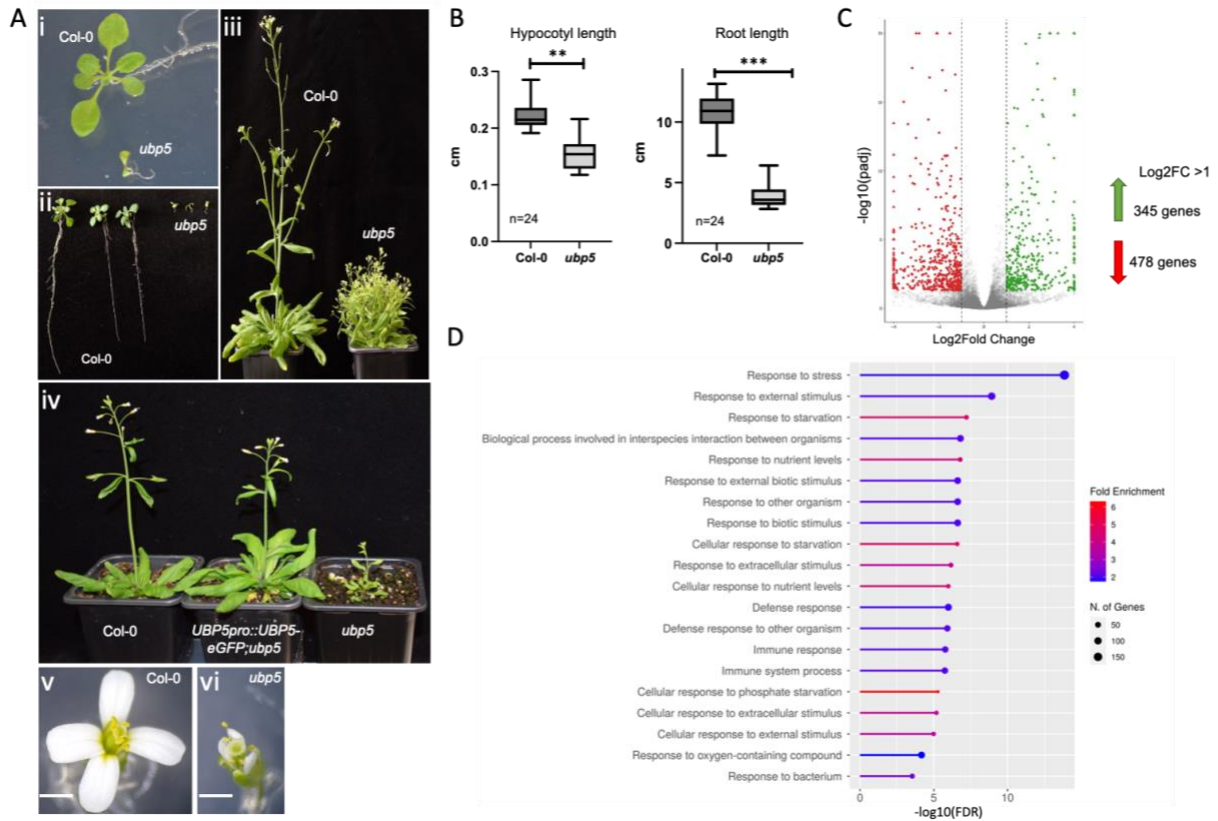

586

587 **Figure 2. UBP5 is an essential plant developmental and stress regulator.** A, Phenotypic  
 588 characterisation of *ubp5* mutant line: i, smaller seedlings; ii, shorter primary roots; and iii) stunted and  
 589 bushy growth (Note: in iii *ubp5* plant was 2 weeks older than the *Col-0* plant) compared to *Col-0* plants;  
 590 iv, complementation of *ubp5* mutant phenotypes in 4-week-old *Arabidopsis* plants (an  
 591 *UBP5pro::UBP5-eGFP* construct was used for the complementation of *ubp5*); v, floral phenotype of  
 592 *Col-0* and vi, *ubp5*. Bar = 1 mm. B, Hypocotyl and root length of *ubp5* versus *Col-0* measured after 10  
 593 days post-germination. Error bars represent standard deviation, significance tested using student t-test,  
 594 \*\*p < 0.05, \*\*\*p < 0.001. C, MA Scatter plot of  $\log_2FC$  versus the  $\log_{10}$  base mean. Genes with a p  
 595 adjusted value (*padj*) lower than 0.05 are colored. The genes with  $\log_2FC < 1$  or  $\log_2FC < -1$  (*padj* <  
 596 0.05) were considered for further analysis. D, Functional categorisation of *ubp5* mis-regulated  
 597 (upregulated and downregulated) genes based in ShinyGO v0.75 analysis. GO analysis of *ubp5* mis-  
 598 regulated genes based on biological process with False Discovery Rate (FDR) < 0.05.

599

600

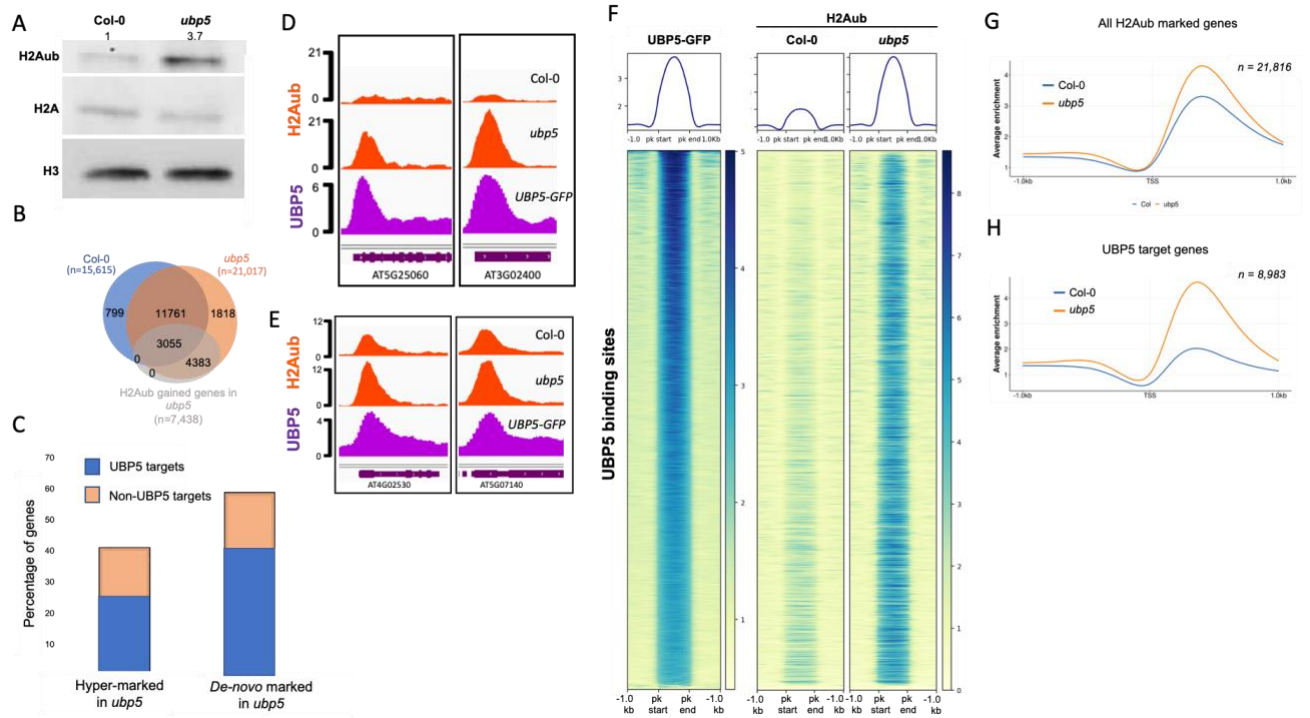

601

602 **Figure 3. UBP5 acts as a H2A deubiquitinase.** A, Western blot of H2Aub and H2A levels in histone  
 603 extracts from seedlings of Col-0 and *ubp5*. Histone H3 is used as loading control. The numbers above  
 604 the gel lanes represent the relative H2Aub levels, which was determined from the band intensity using  
 605 ImageJ software. B, Venn diagram showing the overlap between H2Aub marked genes in Col-0, *ubp5*  
 606 and H2Aub gained genes in *ubp5*, n represents the number of genes. The genes are considered as marked  
 607 when an overlapping H2Aub peak is present in at least two biological replicates based on MACS3 peak  
 608 calling ( $q < 0.05$  and score  $> 30$ ) and H2Aub gained genes in *ubp5* were found using DESeq2 analysis  
 609 ( $FDR < 0.05$ ). C, The graph represents the two categories of genes showing H2Aub changes in *ubp5*:  
 610 hyper-marked genes –genes that show a hyper enrichment of H2Aub in *ubp5* if they were already  
 611 marked in the Col-0– and *de-novo* marked genes –genes only marked in the *ubp5* but not in the Col-0.  
 612 Differential H2Aub analysis was done using DESeq2 analysis ( $FDR < 0.05$ ). D-E, IGV browser views  
 613 of representative UBP5 target loci where (D) *de-novo* marked genes in the *ubp5* mutant and (E) H2Aub  
 614 is hyper-marked in *ubp5*. Gene structures and names are shown underneath each panel. F, Heatmaps  
 615 showing H2Aub distribution on genomic sequences targeted by UBP5 for Col-0 and *ubp5*. UBP5  
 616 binding peaks are clustered based on higher to lower enrichment from top to bottom. G, Metagene plot  
 617 of average H2Aub distribution over 1 kb upstream and downstream from the transcription start site  
 618 (TSS) of all the H2Aub marked genes in Col-0 and *ubp5*. H, Metagene plot of average H2Aub  
 619 distribution over UBP5 target genes in Col-0 and *ubp5*.

620

621

622

623

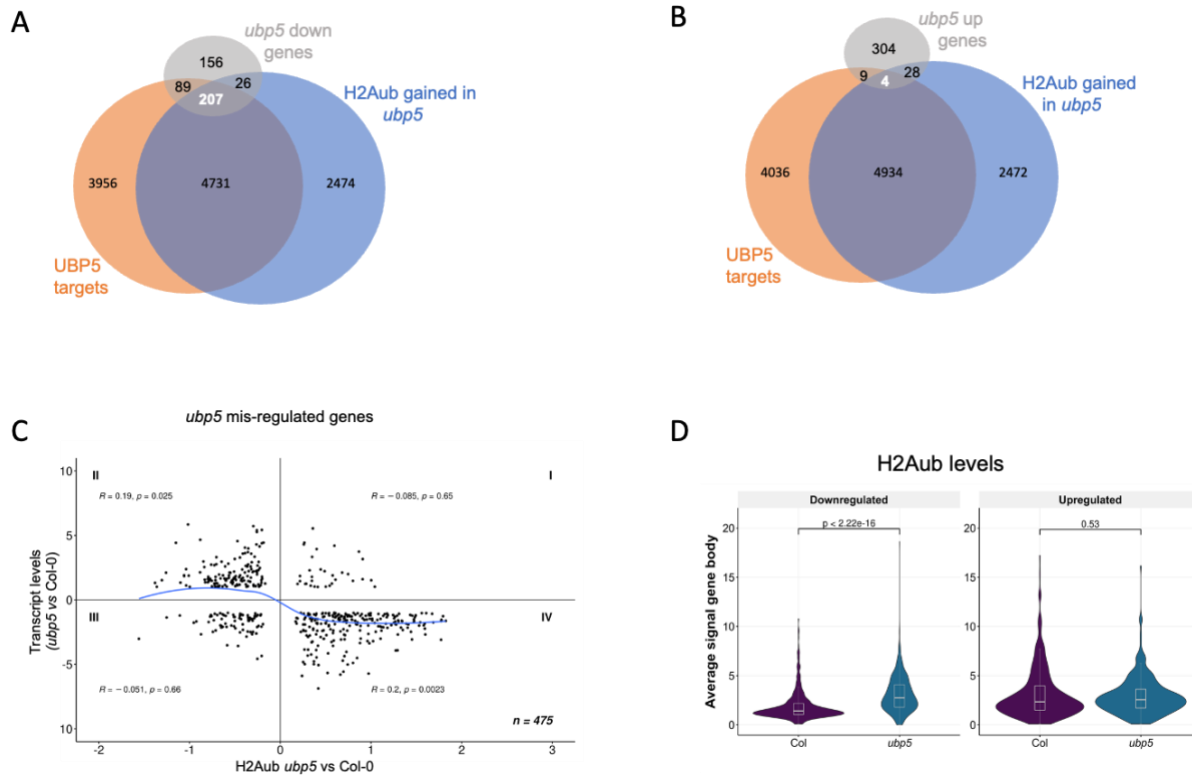

624

625 **Figure 4. UBP5 mediates transcriptional de-repression.** A-B, Venn diagrams showing UBP5  
 626 targets, H2Aub gained genes in *ubp5* and (A) downregulated or (B) upregulated genes in *ubp5* mutant.  
 627 C, Scatter plot showing the correlation between H2Aub and gene expression changes between Col-0  
 628 and *ubp5* plants. The x-axis shows Log2FC levels of H2Aub marked genes as determined by DESeq2  
 629 analysis (FDR < 0.05). The y-axis shows expression Log2FC of misregulated genes in *ubp5* as  
 630 determined by DESeq2 (>1 fold variation, FDR < 0.05). For each quadrant, the correlation coefficient  
 631 (R) along with the significance (p values) are shown. The blue curve shows trend-line from LOWESS  
 632 smoother function. Quadrant IV shows higher correlation between low expressed genes and hyper-  
 633 marking of H2Aub. D, Violin cum box plots represents the average signal of H2Aub at gene body for  
 634 downregulated and upregulated genes in Col-0 and *ubp5*. The median (middle line), upper and lower  
 635 quartiles (boxes) are indicated. Statistical significance is tested according to one-sided Mann–Whitney–  
 636 Wilcoxon test, p values are indicated above the plot.

637

638

639

640

641

642

643

644

645

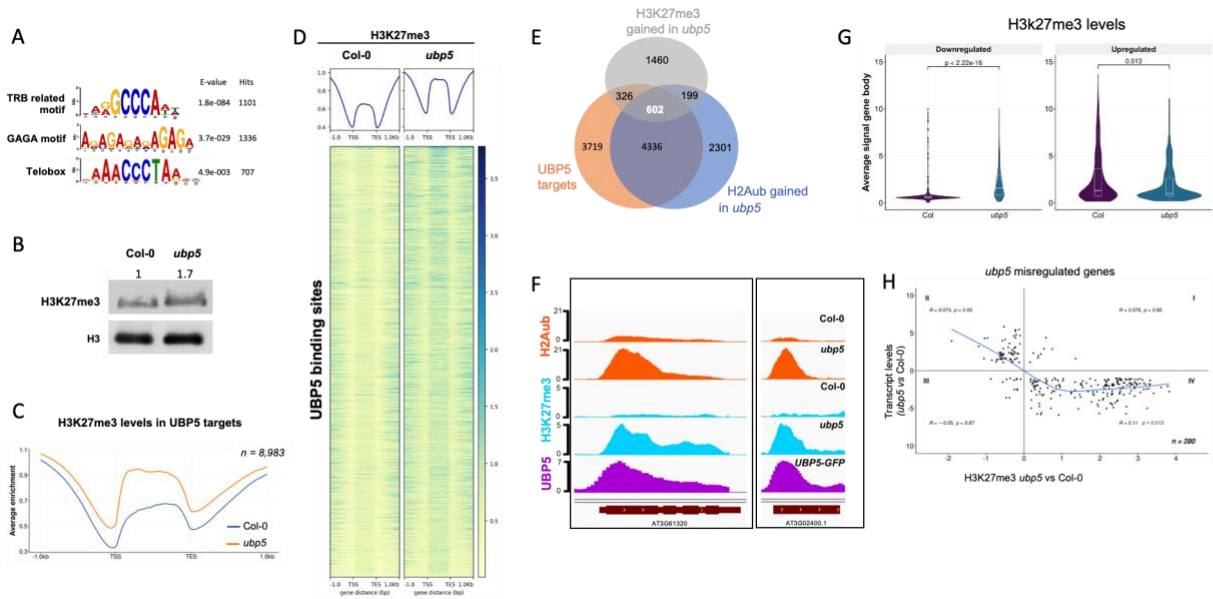

646

647 **Figure 5. UBPF5-mediated H2Aub deubiquitination prevents deposition of H3K27me3.** A, Motif  
 648 enrichment analysis of UBPF5 target genes. The sequence logos, accuracies and hits of the best motifs  
 649 found by MEME-ChIP (Bailey, 2021). B, Western blot of H3K27me3 levels in histone extracts from  
 650 seedlings of Col-0 and *ubp5*. Histone H3 is used as loading control. The numbers above the gel lanes  
 651 represent the relative H3K27me3 level, which was determined from the band intensity using ImageJ  
 652 software. C, Metagene plot of average H3K27me3 enrichment over the UBPF5 target genes in Col-0 and  
 653 *ubp5*. D, Heatmap showing the distribution of H3K27me3 on UBPF5 binding sites for Col-0 and *ubp5*.  
 654 UBPF5 binding peaks are clustered based on higher to lower enrichment from top to bottom. E, Venn  
 655 diagram representing the overlap between UBPF5 targets, H2Aub and H3K27me3 gained genes in *ubp5*  
 656 ( $p_{adj} < 0.05$ ) as determined by DESeq2. F, IGV browser snapshots of representative UBPF5 target genes  
 657 in which H2Aub and H3K27me3 are gained in the *ubp5* mutant. Gene structures and names are shown  
 658 underneath each panel. G, Violin cum box plots represents the average signal of H3K27me3 at gene  
 659 body for downregulated and upregulated genes in Col-0 and *ubp5*. The median (middle line), upper and  
 660 lower quartiles (boxes) are indicated. Statistical significance is tested according to one-sided Mann–  
 661 Whitney–Wilcoxon test, p values are indicated above the plot. H, Scatter plot showing the  
 662 correspondence between H3K27me3 and gene expression changes in between Col-0 and *ubp5* plants.  
 663 The x-axis shows Log2FC levels of H3K27me3 marked genes as determined by DESeq2 analysis (FDR  
 664  $< 0.05$ ). The y-axis shows expression Log2FC of mis-regulated genes in *ubp5* as determined by DESeq2  
 665 ( $>1$  fold variation, FDR  $< 0.05$ ). The blue curve shows trend-line from LOWESS smoother function.  
 666 The correlation coefficient (R) along with the significance (p values) are shown. Quadrant IV shows  
 667 significant correlation between low expressed genes and gaining H3K27me3.

668

669

670

671

672

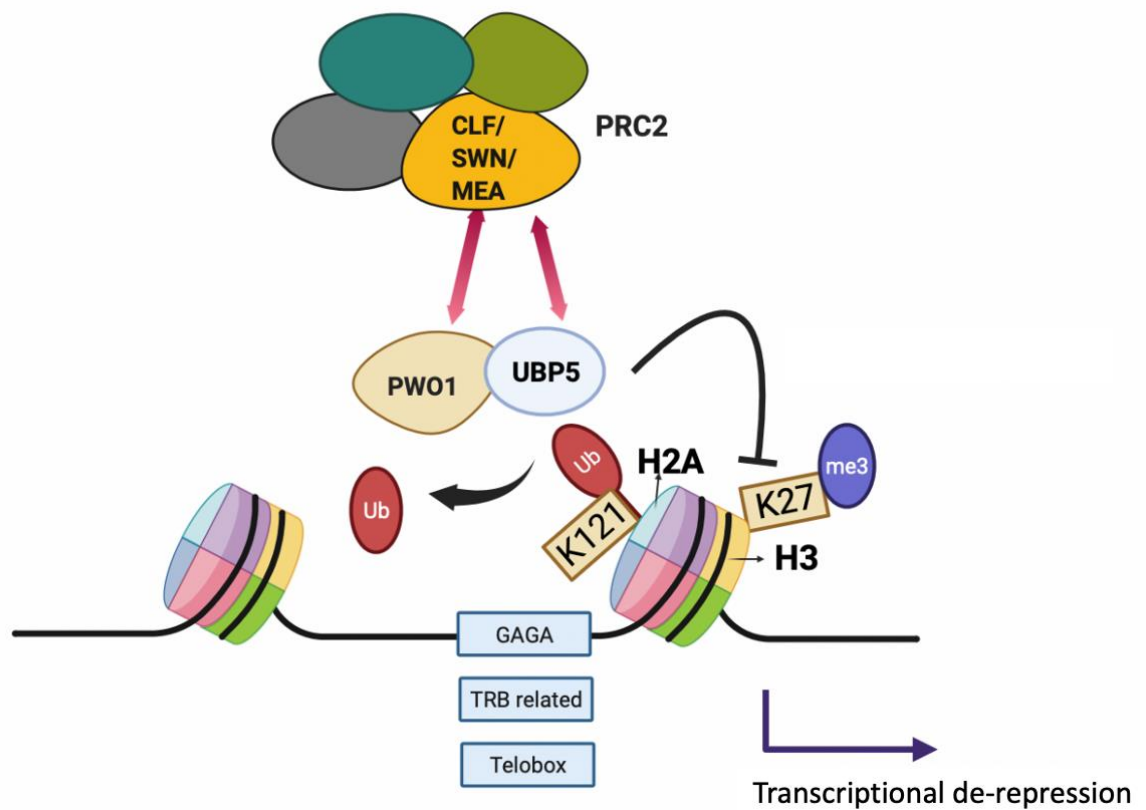

673

674 **Figure 6. Working model for UBP5 function.** UBP5 interacts with both PRC2 and PWO1 and its  
675 recruitment to chromatin associates with TRB- and PRC2-related *cis*-elements (light blue boxes). UBP5  
676 acts as H2A deubiquitinase and prevents deposition of H3K27me3 leading to transcription de-  
677 repression. Figure is created using Biorender.

678

679

680

681

682

683

684

685

686



687 **References**

- 688 1. Lawrence M, Daujat S, Schneider R. Lateral Thinking: How Histone Modifications Regulate  
689 Gene Expression. *Trends Genet* **32**, 42-56 (2016).
- 690  
691 2. Morgan MAJ, Shilatifard A. Reevaluating the roles of histone-modifying enzymes and their  
692 associated chromatin modifications in transcriptional regulation. In: *Nature Genetics* (2020).
- 693  
694 3. Wiles ET, Selker EU. H3K27 methylation: a promiscuous repressive chromatin mark. *Curr Opin*  
695 *Genet Dev* **43**, 31-37 (2017).
- 696  
697 4. Barbour H, Daou S, Hendzel M, Affar EB. Polycomb group-mediated histone H2A  
698 monoubiquitination in epigenome regulation and nuclear processes. *Nat Commun* **11**, 5947  
699 (2020).
- 700  
701 5. Mozgova I, Hennig L. The polycomb group protein regulatory network. *Annu Rev Plant Biol* **66**,  
702 269-296 (2015).
- 703  
704 6. Simon JA, Kingston RE. Mechanisms of polycomb gene silencing: knowns and unknowns. *Nat*  
705 *Rev Mol Cell Biol* **10**, 697-708 (2009).
- 706  
707 7. Godwin J, Farrona S. The Importance of Networking: Plant Polycomb Repressive Complex 2  
708 and Its Interactors. *Epigenomes* **6**, (2022).
- 709  
710 8. Shen Q, Lin Y, Li Y, Wang G. Dynamics of H3K27me3 Modification on Plant Adaptation to  
711 Environmental Cues. In: *Plants* (2021).
- 712  
713 9. Merini W, Calonje M. PRC1 is taking the lead in PcG repression. *Plant J* **83**, 110-120 (2015).
- 714  
715 10. Chittock EC, Latwiel S, Miller TC, Muller CW. Molecular architecture of polycomb repressive  
716 complexes. *Biochem Soc Trans* **45**, 193-205 (2017).
- 717  
718 11. March E, Farrona S. Plant Deubiquitinases and Their Role in the Control of Gene Expression  
719 Through Modification of Histones. *Front Plant Sci* **8**, 2274 (2017).
- 720  
721 12. Derkacheva M, *et al.* H2A deubiquitinases UBP12/13 are part of the Arabidopsis polycomb  
722 group protein system. *Nat Plants* **2**, 16126 (2016).
- 723  
724 13. Kraleman LEM, Liu S, Trejo-Arellano MS, Munoz-Viana R, Kohler C, Hennig L. Removal of  
725 H2Aub1 by ubiquitin-specific proteases 12 and 13 is required for stable Polycomb-mediated  
726 gene repression in Arabidopsis. *Genome Biol* **21**, 144 (2020).

727

- 728 14. Hohenstatt ML, *et al.* PWWP-DOMAIN INTERACTOR OF POLYCOMBS1 interacts with  
729 polycomb-group proteins and histones and regulates arabidopsis flowering and development.  
730 In: *Plant Cell* (2018).
- 731
- 732 15. Tan LM, *et al.* The PEAT protein complexes are required for histone deacetylation and  
733 heterochromatin silencing. *EMBO J* **37**, (2018).
- 734
- 735 16. Deng W, *et al.* Arabidopsis Polycomb Repressive Complex 2 binding sites contain putative  
736 GAGA factor binding motifs within coding regions of genes. In: *BMC genomics*). BioMed  
737 Central (2013).
- 738
- 739 17. Zhou Y, *et al.* Telobox motifs recruit CLF/SWN-PRC2 for H3K27me3 deposition via TRB factors  
740 in Arabidopsis. In: *Nature Genetics*). Springer US (2018).
- 741
- 742 18. Mikulski P, *et al.* The chromatin-associated protein pwo1 interacts with plant nuclear lamin-  
743 like components to regulate nuclear size. In: *Plant Cell* (2019).
- 744
- 745 19. Chanvivattana Y, *et al.* Interaction of Polycomb-group proteins controlling flowering in  
746 Arabidopsis. In: *Development* (2004).
- 747
- 748 20. Yoshida N, *et al.* EMBRYONIC FLOWER2, a novel polycomb group protein homolog, mediates  
749 shoot development and flowering in Arabidopsis. *Plant Cell* **13**, 2471-2481 (2001).
- 750
- 751 21. Ramirez-Prado JS, *et al.* The Polycomb protein LHP1 regulates Arabidopsis thaliana stress  
752 responses through the repression of the MYC2-dependent branch of immunity. *Plant J* **100**,  
753 1118-1131 (2019).
- 754
- 755 22. Kleinmanns JA, Schatlowski N, Heckmann D, Schubert D. BLISTER Regulates Polycomb-Target  
756 Genes, Represses Stress-Regulated Genes and Promotes Stress Responses in Arabidopsis  
757 thaliana. *Front Plant Sci* **8**, 1530 (2017).
- 758
- 759 23. Rao-Naik C, Chandler JS, McArdle B, Callis J. Ubiquitin-specific proteases from Arabidopsis  
760 thaliana: cloning of AtUBP5 and analysis of substrate specificity of AtUBP3, AtUBP4, and  
761 AtUBP5 using Escherichia coli in vivo and in vitro assays. *Arch Biochem Biophys* **379**, 198-208  
762 (2000).
- 763
- 764 24. Sridhar VV, *et al.* Control of DNA methylation and heterochromatic silencing by histone H2B  
765 deubiquitination. *Nature* **447**, 735-738 (2007).
- 766
- 767 25. Nassrallah A, *et al.* DET1-mediated degradation of a SAGA-like deubiquitination module  
768 controls H2Bub homeostasis. *Elife* **7**, (2018).
- 769
- 770 26. Derkacheva M, *et al.* H2A deubiquitinases UBP12/13 are part of the Arabidopsis polycomb  
771 group protein system. In: *Nature Plants* (2016).

- 772  
773 27. Berardini TZ, *et al.* The Arabidopsis information resource: Making and mining the "gold  
774 standard" annotated reference plant genome. *Genesis* **53**, 474-485 (2015).
- 775  
776 28. Machanick P, Bailey TL. MEME-ChIP: motif analysis of large DNA datasets. *Bioinformatics* **27**,  
777 1696-1697 (2011).
- 778  
779 29. Xiao J, *et al.* Cis and trans determinants of epigenetic silencing by Polycomb repressive  
780 complex 2 in Arabidopsis. In: *Nature Genetics*). Nature Publishing Group, a division of  
781 Macmillan Publishers Limited. All Rights Reserved. (2017).
- 782  
783 30. Zhou Y, Hartwig B, James GV, Schneeberger K, Turck F. Complementary Activities of  
784 TELOMERE REPEAT BINDING Proteins and Polycomb Group Complexes in Transcriptional  
785 Regulation of Target Genes. *Plant Cell* **28**, 87-101 (2016).
- 786  
787 31. Zhou Y, Romero-Campero FJ, Gómez-ZambranoÁngeles, Turck F, Calonje M. H2A  
788 monoubiquitination in Arabidopsis thaliana is generally independent of LHP1 and PRC2  
789 activity. In: *Genome Biology*). Genome Biology (2017).
- 790  
791 32. Atanassov BS, *et al.* ATXN7L3 and ENY2 Coordinate Activity of Multiple H2B Deubiquitinases  
792 Important for Cellular Proliferation and Tumor Growth. *Mol Cell* **62**, 558-571 (2016).
- 793  
794 33. Zhao Y, *et al.* A TFTC/STAGA module mediates histone H2A and H2B deubiquitination,  
795 coactivates nuclear receptors, and counteracts heterochromatin silencing. *Mol Cell* **29**, 92-101  
796 (2008).
- 797  
798 34. Zhu P, *et al.* A histone H2A deubiquitinase complex coordinating histone acetylation and H1  
799 dissociation in transcriptional regulation. *Mol Cell* **27**, 609-621 (2007).
- 800  
801 35. Grasser KD, Rubio V, Barneche F. Multifaceted activities of the plant SAGA complex. *Biochim*  
802 *Biophys Acta Gene Regul Mech* **1864**, 194613 (2021).
- 803  
804 36. Teano G, *et al.* *BioRxiv*, (2021).
- 805  
806 37. Foglizzo M, *et al.* A bidentate Polycomb Repressive-Deubiquitinase complex is required for  
807 efficient activity on nucleosomes. *Nat Commun* **9**, 3932 (2018).
- 808  
809 38. Scheuermann JC, *et al.* Histone H2A deubiquitinase activity of the Polycomb repressive  
810 complex PR-DUB. *Nature* **465**, 243-247 (2010).
- 811  
812 39. Sahtoe DD, van Dijk WJ, Ekkebus R, Ovaa H, Sixma TK. BAP1/ASXL1 recruitment and activation  
813 for H2A deubiquitination. *Nat Commun* **7**, 10292 (2016).
- 814

- 815 40. Hayama R, *et al.* Ubiquitin carboxyl-terminal hydrolases are required for period maintenance  
816 of the circadian clock at high temperature in Arabidopsis. *Sci Rep* **9**, 17030 (2019).
- 817
- 818 41. Yang P, Smalle J, Lee S, Yan N, Emborg TJ, Vierstra RD. Ubiquitin C-terminal hydrolases 1 and  
819 2 affect shoot architecture in Arabidopsis. *Plant J* **51**, 441-457 (2007).
- 820
- 821 42. Valles GJ, Bezsonova I, Woodgate R, Ashton NW. USP7 Is a Master Regulator of Genome  
822 Stability. *Front Cell Dev Biol* **8**, 717 (2020).
- 823
- 824 43. Lee JE, Park CM, Kim JH. USP7 deubiquitinates and stabilizes EZH2 in prostate cancer cells.  
825 *Genet Mol Biol* **43**, e20190338 (2020).
- 826
- 827 44. Maat H, *et al.* The USP7-TRIM27 axis mediates non-canonical PRC1.1 function and is a  
828 druggable target in leukemia. *iScience* **24**, 102435 (2021).
- 829
- 830 45. Rawat R, Starczynowski DT, Ntziachristos P. Nuclear deubiquitination in the spotlight: the  
831 multifaceted nature of USP7 biology in disease. *Curr Opin Cell Biol* **58**, 85-94 (2019).
- 832
- 833 46. Yu M, Liu K, Mao Z, Luo J, Gu W, Zhao W. USP11 Is a Negative Regulator to gammaH2AX  
834 Ubiquitylation by RNF8/RNF168. *J Biol Chem* **291**, 959-967 (2016).
- 835
- 836 47. Gomez-Zambrano A, Merini W, Calonje M. The repressive role of Arabidopsis H2A.Z in  
837 transcriptional regulation depends on AtBMI1 activity. *Nat Commun* **10**, 2828 (2019).
- 838
- 839 48. Vissers JH, Nicassio F, van Lohuizen M, Di Fiore PP, Citterio E. The many faces of ubiquitinated  
840 histone H2A: insights from the DUBs. *Cell Div* **3**, 8 (2008).
- 841
- 842 49. Lu F, Cui X, Zhang S, Jenuwein T, Cao X. Arabidopsis REF6 is a histone H3 lysine 27 demethylase.  
843 *Nat Genet* **43**, 715-719 (2011).
- 844
- 845 50. Yin X, *et al.* H2AK121ub in Arabidopsis associates with a less accessible chromatin state at  
846 transcriptional regulation hotspots. In: *Nature Communications*). Springer US (2021).
- 847
- 848 51. Santos AP, *et al.* Tidying-up the plant nuclear space: domains, functions, and dynamics. In:  
849 *Journal of experimental botany*) (2020).
- 850
- 851 52. Calonje M. PRC1 Marks the Difference in Plant PcG Repression. In: *Molecular Plant*). © The  
852 Author. All rights reserved. (2014).
- 853
- 854 53. Liu S, Trejo-Arellano MS, Qiu Y, Eklund DM, Kohler C, Hennig L. H2A ubiquitination is essential  
855 for Polycomb Repressive Complex 1-mediated gene regulation in *Marchantia polymorpha*.  
856 *Genome Biol* **22**, 253 (2021).

857

- 858 54. Dupouy G, *et al.* Plastid ribosome protein L5 is essential for post-globular embryo  
859 development in *Arabidopsis thaliana*. *Plant Reprod*, (2022).
- 860
- 861 55. Lei Y, Lu L, Liu HY, Li S, Xing F, Chen LL. CRISPR-P: a web tool for synthetic single-guide RNA  
862 design of CRISPR-system in plants. *Mol Plant* **7**, 1494-1496 (2014).
- 863
- 864 56. Clough SJ, Bent AF. Floral dip: a simplified method for *Agrobacterium*-mediated  
865 transformation of *Arabidopsis thaliana*. *Plant J* **16**, 735-743 (1998).
- 866
- 867 57. Edwards K, Johnstone C, Thompson C. A simple and rapid method for the preparation of plant  
868 genomic DNA for PCR analysis. *Nucleic Acids Res* **19**, 1349 (1991).
- 869
- 870 58. Zhong S, Lin Z, Fray RG, Grierson D. Improved plant transformation vectors for fluorescent  
871 protein tagging. *Transgenic Res* **17**, 985-989 (2008).
- 872
- 873 59. Gietz RD, Schiestl RH. Quick and easy yeast transformation using the LiAc/SS carrier DNA/PEG  
874 method. *Nat Protoc* **2**, 35-37 (2007).
- 875
- 876 60. Kawai S, Hashimoto W, Murata K. Transformation of *Saccharomyces cerevisiae* and other  
877 fungi: methods and possible underlying mechanism. *Bioeng Bugs* **1**, 395-403 (2010).
- 878
- 879 61. Bleckmann A, Weidtkamp-Peters S, Seidel CA, Simon R. Stem cell signaling in *Arabidopsis*  
880 requires CRN to localize CLV2 to the plasma membrane. *Plant Physiol* **152**, 166-176 (2010).
- 881
- 882 62. Dobin A, *et al.* STAR: ultrafast universal RNA-seq aligner. *Bioinformatics* **29**, 15-21 (2013).
- 883
- 884 63. Zhang Y, *et al.* Model-based analysis of ChIP-Seq (MACS). *Genome Biol* **9**, R137 (2008).
- 885
- 886 64. Thorvaldsdottir H, Robinson JT, Mesirov JP. Integrative Genomics Viewer (IGV): high-  
887 performance genomics data visualization and exploration. *Brief Bioinform* **14**, 178-192 (2013).
- 888
- 889 65. Quinlan AR, Hall IM. BEDTools: a flexible suite of utilities for comparing genomic features.  
890 *Bioinformatics* **26**, 841-842 (2010).
- 891
- 892 66. Anders S, Huber W. Differential expression analysis for sequence count data. *Genome Biol* **11**,  
893 R106 (2010).
- 894
- 895 67. Bourbousse C, Vegesna N, Law JA. SOG1 activator and MYB3R repressors regulate a complex  
896 DNA damage network in *Arabidopsis*. *Proc Natl Acad Sci U S A* **115**, E12453-E12462 (2018).
- 897
- 898 68. Langmead B, Trapnell C, Pop M, Salzberg SL. Ultrafast and memory-efficient alignment of short  
899 DNA sequences to the human genome. *Genome Biol* **10**, R25 (2009).

900

- 901 69. Ramirez F, Dundar F, Diehl S, Gruning BA, Manke T. deepTools: a flexible platform for exploring  
902 deep-sequencing data. *Nucleic Acids Res* **42**, W187-191 (2014).
- 903
- 904 70. Czechowski T, Stitt M, Altmann T, Udvardi MK, Scheible WR. Genome-wide identification and  
905 testing of superior reference genes for transcript normalization in *Arabidopsis*. *Plant Physiol*  
906 **139**, 5-17 (2005).
- 907
- 908 71. Livak KJ, Schmittgen TD. Analysis of relative gene expression data using real-time quantitative  
909 PCR and the  $2^{-\Delta\Delta C(T)}$  Method. *Methods* **25**, 402-408 (2001).
- 910
- 911 72. Krzyszton M, Yatusevich R, Wrona M, Sacharowski SP, Adamska D, Swiezewski S. Single seeds  
912 exhibit transcriptional heterogeneity during secondary dormancy induction. *Plant Physiol*,  
913 (2022).
- 914
- 915 73. Hennig BP, *et al.* Large-Scale Low-Cost NGS Library Preparation Using a Robust Tn5 Purification  
916 and Tagmentation Protocol. *G3 (Bethesda)* **8**, 79-89 (2018).
- 917
- 918 74. Alpern D, *et al.* transcriptomics enabled by bulk RNA barcoding and sequencing. In: *Genome*  
919 *Biology*. Genome Biology (2019).
- 920
- 921 75. Love MI, Huber W, Anders S. Moderated estimation of fold change and dispersion for RNA-  
922 seq data with DESeq2. *Genome Biol* **15**, 550 (2014).
- 923
- 924 76. Ge SX, Jung D, Yao R. ShinyGO: a graphical gene-set enrichment tool for animals and plants.  
925 *Bioinformatics* **36**, 2628-2629 (2020).
- 926
- 927
